# Supplementary material for: Hard clam walking: Active horizontal locomotion of adult Mercenaria mercenaria at the sediment surface and behavioral suppression after extensive sampling
Source: PLoS One. 2017 Mar 9;12(3):e0173626. doi: 10.1371/journal.pone.0173626 (PMC5344501; doi:10.1371/journal.pone.0173626)
Supplement: S5 Table — Histological data. (XLSX) [file pone.0173626.s006.xlsx]

## Sheet: Histology
S5 Table. Reproductive condition, parasite load of walking, non-walking clams. Histological data
Gonadal stages after Kim & Powell 2004
	Clam		Gonadal	Parasites
Date	Designation	Sex	Stage	Present
2010-07-19	walking	M	S2
2010-07-19	walking	F	S4
2010-07-19	walking	F	S3
2010-07-19	walking	F	S3
2010-07-19	walking	F	S4
2010-07-19	walking	M	S3
2010-07-19	walking	M	D1
2010-07-19	walking	M	S4
2010-07-19	walking	M	S3
2010-07-19	walking	F	S4
2010-07-19	walking	M	D2
2010-07-19	walking	M	S3
2010-07-19	walking	M	D1	1 trematode in visceral mass
2010-07-19	walking	M	S3
2010-07-19	walking	M	S3
2010-07-19	walking	F	S4
2010-07-19	walking	M	S1
2010-07-19	walking	M	S3	1 trematode in gill
2010-07-19	walking	M	S3
2010-07-19	walking	M	S2
2010-07-19	walking	M	S4
2010-07-19	walking	F	S3
2010-07-19	walking	M	S3
2012-06-12	walking	M	D1
2012-06-12	walking	M	D2
2012-06-12	walking	M	D1
2012-06-12	walking	F	S3
2012-06-12	walking	F	S3
2012-06-12	walking	F	S3
2012-06-12	walking	M	D2
2012-06-12	walking	F	S4
2012-06-12	walking	F	S3
2012-06-12	walking	F	S2
2012-06-12	walking	M	D2
2012-06-12	walking	F	S3
2012-06-12	walking	F	S1
2012-06-12	walking	F	S2
2012-06-12	walking	F	S3
2012-06-12	walking	M	D2
2012-06-12	non-walking	F	S1
2012-06-12	non-walking	M	D2
2012-06-12	non-walking	M	D1
2012-06-12	non-walking	F	S1
2012-06-12	non-walking	F	S2
2012-06-12	non-walking	F	S2
2012-06-12	non-walking	M	D2
2012-06-12	non-walking	F	S2
2012-06-12	non-walking	M	D1
2012-06-12	non-walking	F	S1
2012-06-12	non-walking	F	S3
2012-06-12	non-walking	F	S3
